# Supplementary material for: Quantum dot to quantum dot Förster resonance energy transfer: engineering materials for visual color change sensing
Source: Royal Society of Chemistry journal article supplement (doi:10.1039/d0an00746c), 2020-01-01
Supplement: d0an00746c1.pdf [file d0an00746c1.pdf]

# Quantum Dot to Quantum Dot Förster Resonance Energy Transfer: Engineering Materials for Visual Color Change Sensing

*Margaret Chern,<sup>a</sup> Reyhaneh Toufanian,<sup>a</sup> Allison M. Dennis<sup>\*a, b</sup>*

<sup>a</sup> Materials Science and Engineering, Boston University, Boston, MA, USA 02215;

<sup>b</sup> Biomedical Engineering, Boston University, Boston, MA, USA 02215

**Supporting Information.**

## Quantum Dot Characterization:

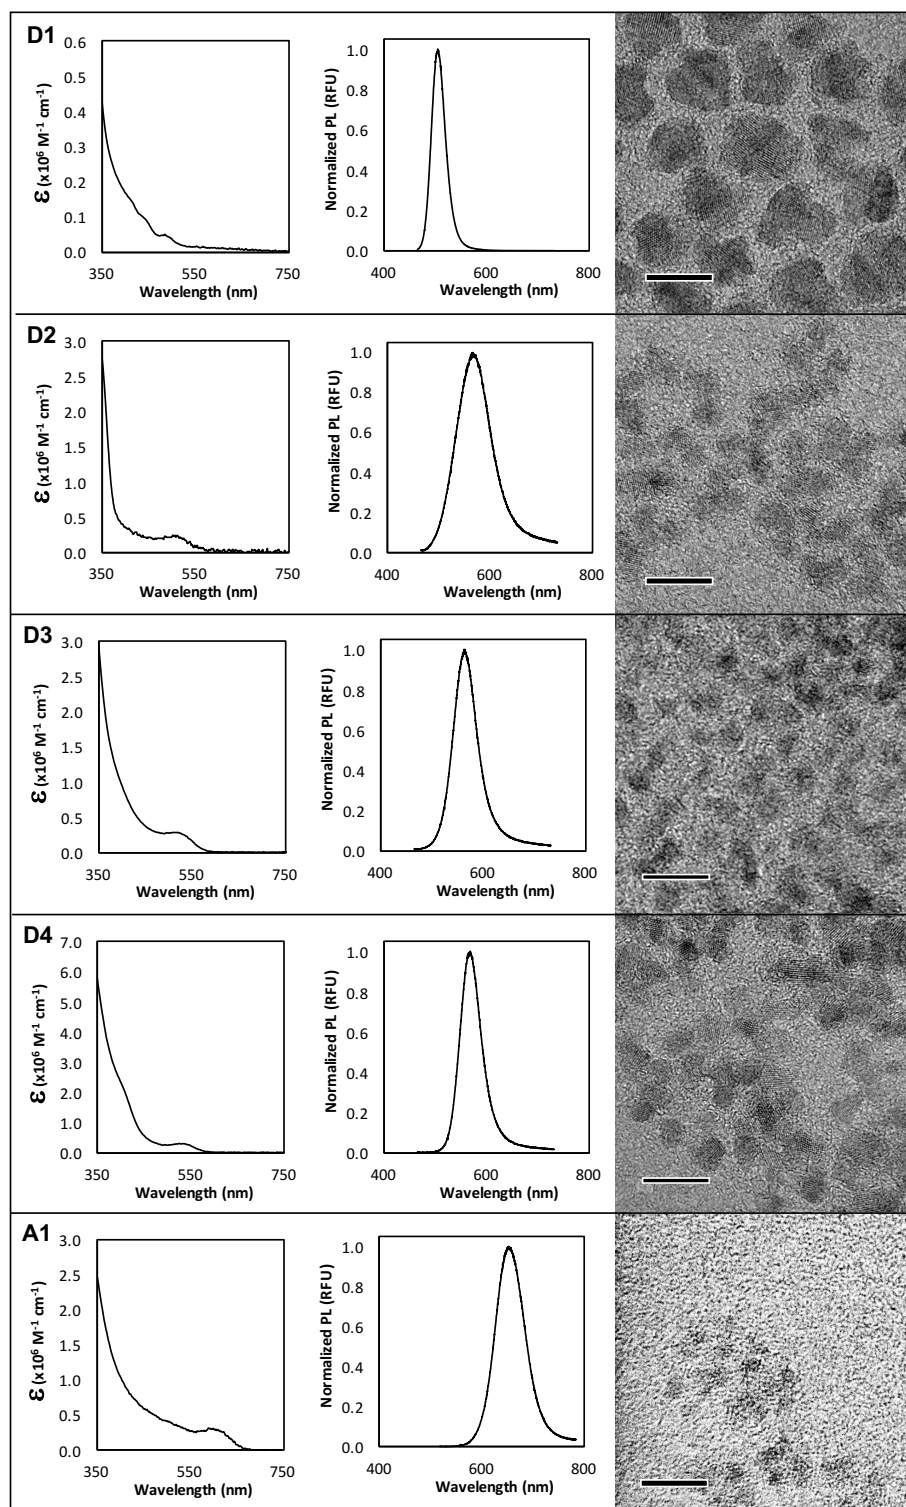

**Figure S1.** Optical and physical properties of the QDs used in this work. From left to right: molar extinction coefficient, photoluminescence spectra, and TEM images (scale bar = 10 nm) are shown. Each quantum dot is labeled as either a donor (D#) or acceptor (A#) in the top left corner, corresponding to row labels used in Table 1 in the main text.

### PL decays for select donor-acceptor pairs:

To confirm that color change is energy transfer related, PL decay curves (lifetimes) were taken in addition to steady-state PL. 200  $\mu\text{L}$  of selected FRET assays were taken directly from the plate assays described in the main text and loaded into low volume quartz cuvettes and measured in the donor fluorescence channel using a fluorescence lifetime spectrometer (LifeSpec II, Edinburg Instruments) employing a time-correlated single photon counting (TCSPC). A 405 nm pulse diode laser (EPL-205, Edinburg Instruments) was used to excite the samples at a 2  $\mu\text{s}$  pulse period. Photons were counted over a 0.5 – 2  $\mu\text{s}$  time range with channel widths of 1.02 ns. The collected lifetimes were fit to a tri-exponential decay (F980 Software, Edinburg Instruments):

$$I(t) = A_1\tau_1 e^{-\frac{t}{\tau_1}} + A_2\tau_2 e^{-\frac{t}{\tau_2}} + A_3\tau_3 e^{-\frac{t}{\tau_3}} \quad (\text{S1})$$

where  $t$  represents time and  $A_i$  are coefficients that indicate the weight associated with each decay time. Average amplitude weighted lifetimes were calculated using:<sup>1</sup>

$$\tau_{ave} = \frac{A_1\tau_1 + A_2\tau_2 + A_3\tau_3}{A_1 + A_2 + A_3} \quad (\text{S2})$$

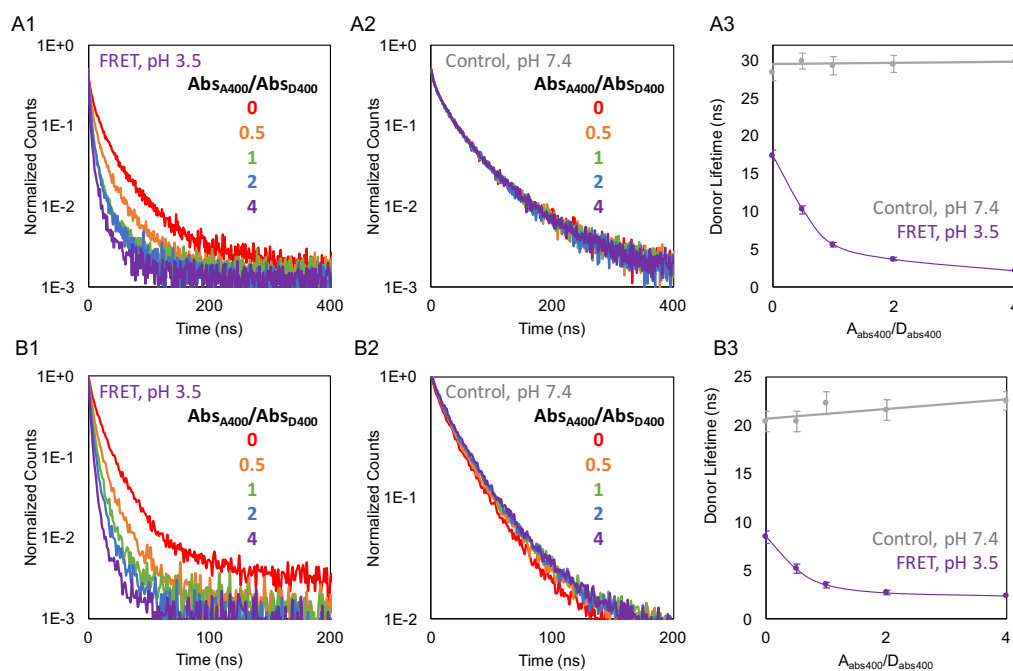

**Figure S2.** PL Decay curves for an InP/4ZnSe/3ZnS QD (D3) and a CdxZn<sub>1-x</sub>SeyS<sub>1-y</sub> QD (D1) acting as donors to an InP/3ZnS acceptor (A1). Data were collected for each acceptor/donor ratio at pH 3.5 (column 1) and pH 7.4 (column 2) for the FRET and control systems respectively. The decay curves were fit to Eqn 1 and average lifetimes were calculated using Eqn 2. Donor lifetimes were plotted in column 3 and decreases as acceptor to donor ratio increases at pH 3.5 indicating energy transfer. Donor lifetime significantly decreases after aggregation, even with no acceptors present, indicating that donor-donor homoFRET is occurring.

### Spectral Data of Aggregation Assays:

**Table S1.** PL Spectra of all assays described in the main paper. Column 1 indicates the donor paired with the A1 acceptor, column 2 shows PL at pH 7.4, column 3 shows PL at pH 3.5, and column 4 and 5 depict the donor quenching and  $F_a/F_d$ , respectively, at each acceptor/donor ratio in the unaggregated (grey) and aggregated (purple) states.

|                                | pH 7.4 | pH 3.5 | Donor Quenching | $F_a/F_d$ |                                                                     |
|--------------------------------|--------|--------|-----------------|-----------|---------------------------------------------------------------------|
| <b>D1</b>                      |        |        |                 |           | $\text{Cd}_x\text{Zn}_{1-x}\text{Se}_y\text{S}_{1-y}$<br>+ InP/3ZnS |
| <b>D1</b><br>Donor diluted 10x |        |        |                 |           | $\text{Cd}_x\text{Zn}_{1-x}\text{Se}_y\text{S}_{1-y}$<br>+ InP/3Zn  |
| <b>D2</b>                      |        |        |                 |           | InP/7ZnS + InP/3ZnS                                                 |

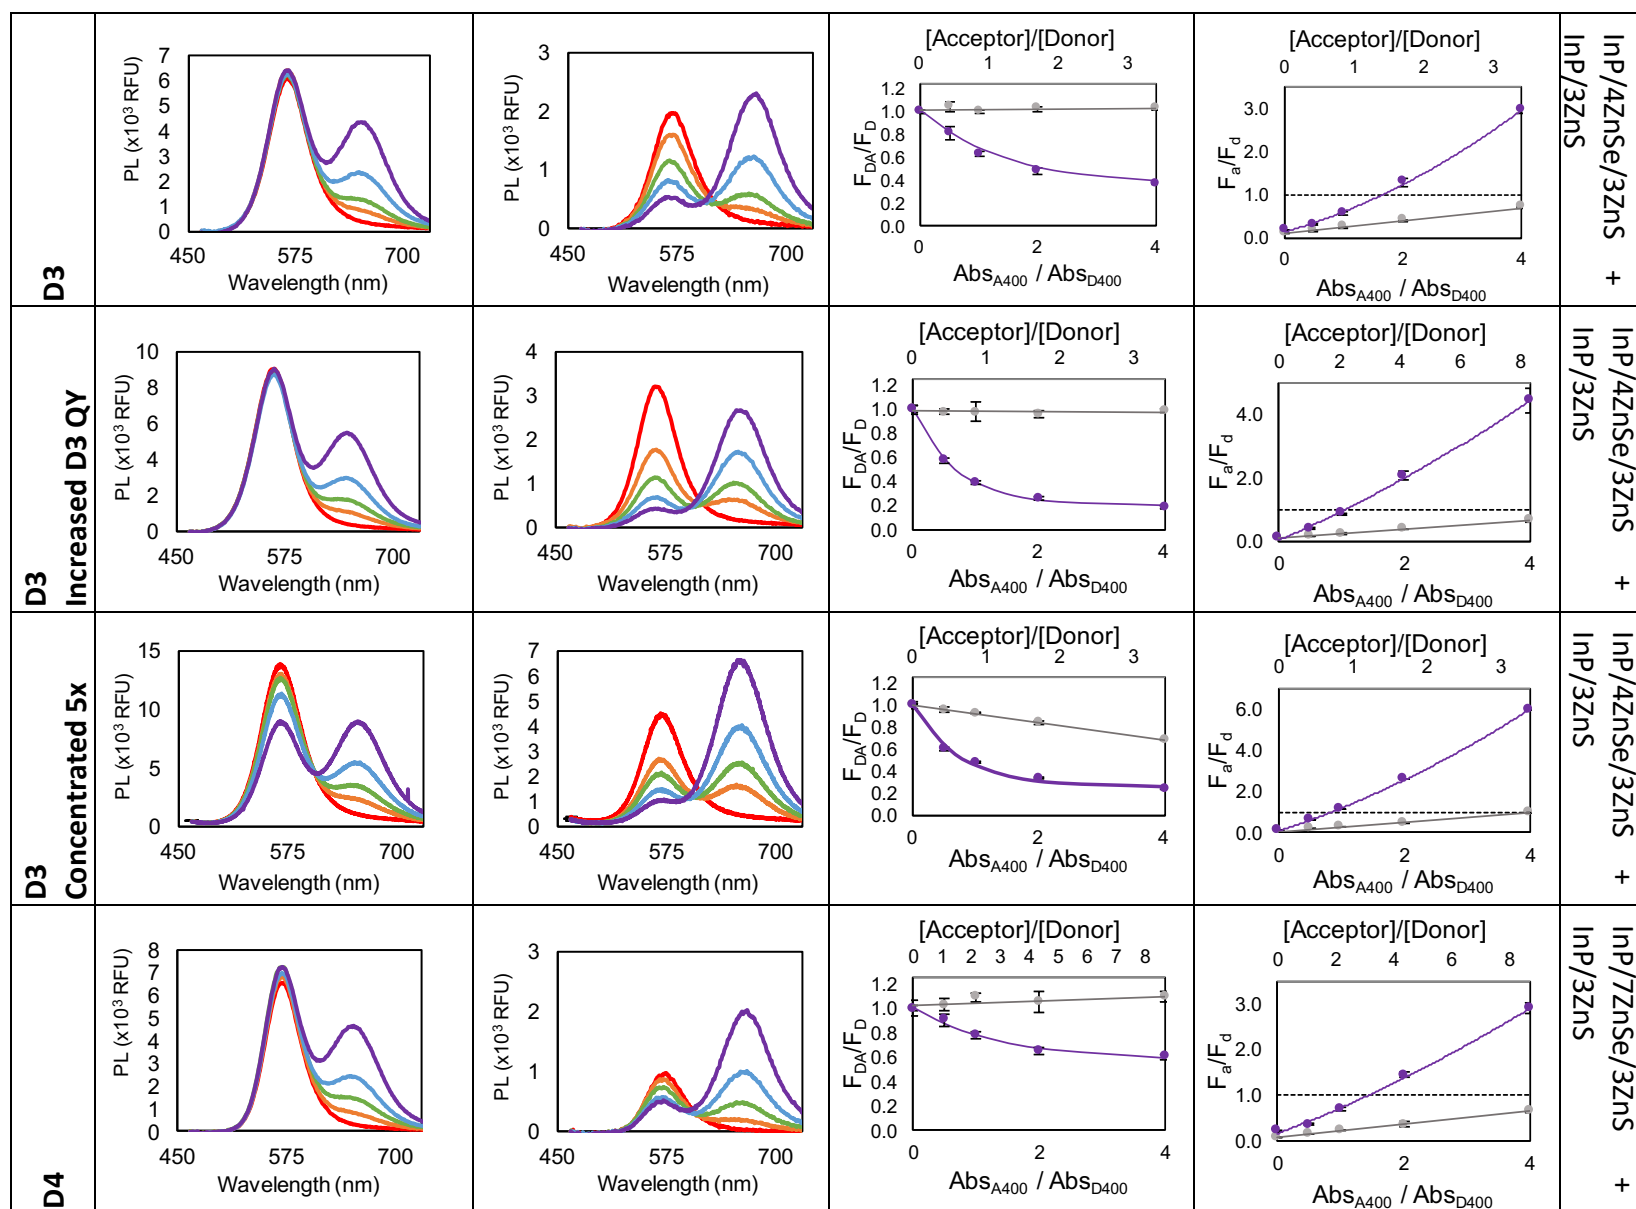

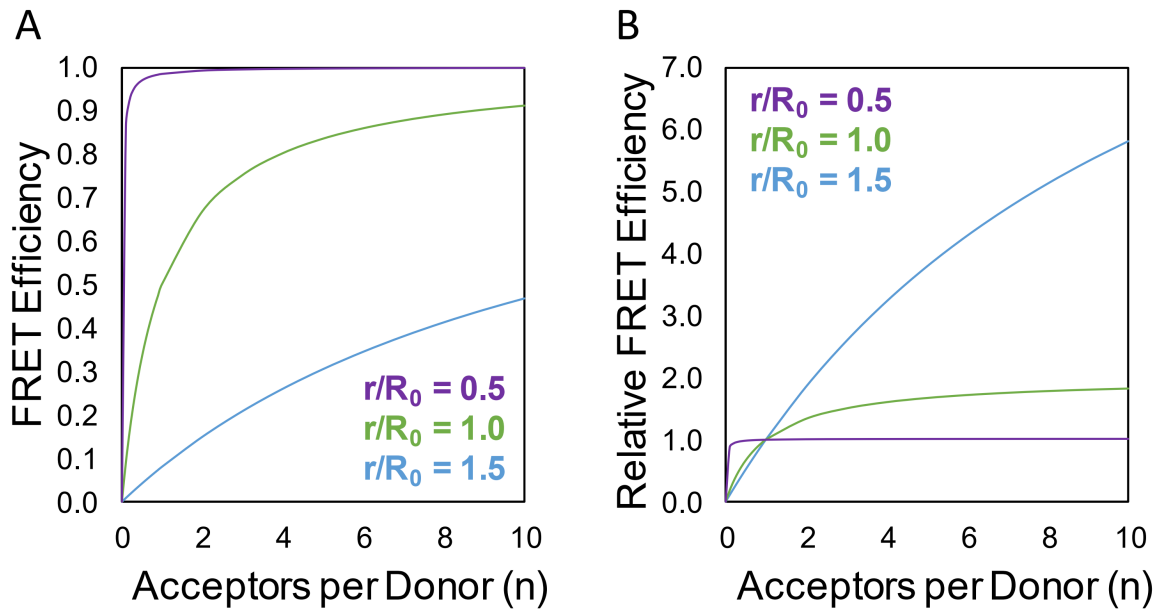

**Figure S3. (A)** FRET efficiency as a function of the number of acceptors per donor for different donor-acceptor distances. If using the same number of acceptors per donor, the more compact FRET pair always has the greatest FRET efficiency. In systems with larger donor-acceptor distances, however, low FRET efficiency can be alleviated by increasing acceptor to donor ratio. In panel **(B)** each of the lines are normalized to their FRET efficiencies where  $n = 1$  in order to more easily visualize the effect of increased acceptor to donor ratio on each FRET system. Lines are calculated by plugging into Eqn. 1 from the main text.
